# Supplementary material for: Optical absorption and excitonic coupling in azobenzenes forming self-assembled monolayers: a study based on density functional theory
Source: Royal Society of Chemistry journal article supplement (doi:10.1039/c1cp22793a), 2011-01-01
Supplement: c1cp22793a.pdf [file c1cp22793a.pdf]

## Supporting Information

### Dimer geometry

The following table gives the coordinates of the *trans* TF-Az-OMe dimer at a distance  $R = 7.8 \text{ \AA}$ , with monomer coordinates optimized for the  $S_0$  state on the B3LYP/6-31G\* level of theory.

| atom | x         | y         | z          | atom | x         | y         | z          |
|------|-----------|-----------|------------|------|-----------|-----------|------------|
| atom | x         | y         | z          |      |           |           |            |
| C    | -1.703854 | 2.356859  | -6.631330  | C    | -1.703854 | -5.443141 | -6.631330  |
| C    | -0.654184 | 2.534540  | -5.722633  | C    | -0.654184 | -5.265460 | -5.722633  |
| C    | 0.424212  | 3.374367  | -6.074178  | C    | 0.424212  | -4.425633 | -6.074178  |
| C    | 0.436365  | 4.009534  | -7.300044  | C    | 0.436365  | -3.790466 | -7.300044  |
| C    | -0.625552 | 3.825703  | -8.209851  | C    | -0.625552 | -3.974297 | -8.209851  |
| C    | -1.701102 | 2.993849  | -7.870478  | C    | -1.701102 | -4.806151 | -7.870478  |
| N    | -0.772803 | 1.837611  | -4.505097  | N    | -0.772803 | -5.962389 | -4.505097  |
| N    | 0.177104  | 2.014133  | -3.690800  | N    | 0.177104  | -5.785867 | -3.690800  |
| C    | 0.044849  | 1.301472  | -2.471707  | C    | 0.044849  | -6.498528 | -2.471707  |
| C    | 1.074842  | 1.501344  | -1.543075  | C    | 1.074842  | -6.298656 | -1.543075  |
| C    | 1.050320  | 0.852502  | -0.312272  | C    | 1.050320  | -6.947498 | -0.312272  |
| C    | -0.008693 | -0.004211 | -0.002442  | C    | -0.008693 | -7.804211 | -0.002442  |
| C    | -1.042349 | -0.207973 | -0.927327  | C    | -1.042349 | -8.007973 | -0.927327  |
| C    | -1.019707 | 0.439737  | -2.154726  | C    | -1.019707 | -7.360263 | -2.154726  |
| C    | -0.008693 | -0.756210 | 1.300058   | C    | -0.008693 | -8.556210 | 1.300058   |
| F    | 0.610319  | -1.955661 | 1.185214   | F    | 0.610319  | -9.755661 | 1.185214   |
| O    | -0.508222 | 4.498168  | -9.383646  | O    | -0.508222 | -3.301832 | -9.383646  |
| C    | -1.539756 | 4.361743  | -10.352220 | C    | -1.539756 | -3.438257 | -10.352220 |
| F    | 0.635491  | -0.076677 | 2.275317   | F    | 0.635491  | -7.876677 | 2.275317   |
| F    | -1.262794 | -1.005905 | 1.739357   | F    | -1.262794 | -8.805905 | 1.739357   |
| H    | -2.525501 | 1.707126  | -6.345508  | H    | -2.525501 | -6.092874 | -6.345508  |
| H    | -2.526901 | 2.838973  | -8.554799  | H    | -2.526901 | -4.961027 | -8.554799  |
| H    | 1.255070  | 4.659675  | -7.592600  | H    | 1.255070  | -3.140325 | -7.592600  |
| H    | 1.234967  | 3.507735  | -5.366851  | H    | 1.234967  | -4.292265 | -5.366851  |
| H    | 1.884275  | 2.174071  | -1.808293  | H    | 1.884275  | -5.625929 | -1.808293  |
| H    | 1.844750  | 1.013938  | 0.408581   | H    | 1.844750  | -6.786062 | 0.408581   |
| H    | -1.864974 | -0.869781 | -0.675746  | H    | -1.864974 | -8.669781 | -0.675746  |
| H    | -1.812104 | 0.297056  | -2.880367  | H    | -1.812104 | -7.502944 | -2.880367  |
| H    | -1.645378 | 3.320043  | -10.680705 | H    | -1.645378 | -4.479957 | -10.680705 |
| H    | -2.502128 | 4.720493  | -9.965694  | H    | -2.502128 | -3.079507 | -9.965694  |
| H    | -1.236238 | 4.979608  | -11.198701 | H    | -1.236238 | -2.820392 | -11.198701 |

Table 1: Cartesian coordinates of the TF-Az-OMe dimer at intermolecular distance of 7.8 Å. The optimized structure of the monomers was used.

## Lowest-energy $\pi \rightarrow \pi^*$ transition

The lowest-energy  $\pi \rightarrow \pi^*$  transition in TF-Az-OMe is dominated by a HOMO  $\rightarrow$  LUMO excitation. The frontier orbitals are schematically indicated in the following figure.

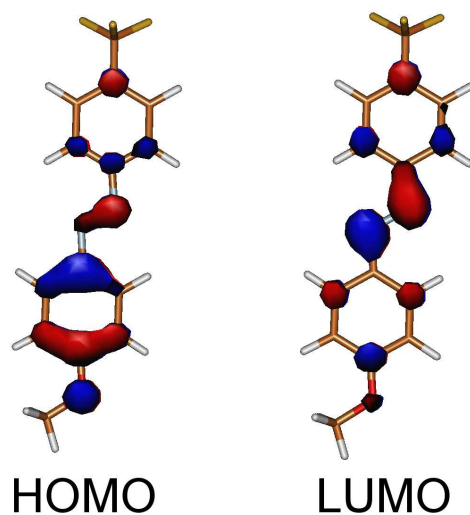

Figure 1: Kohn-Sham frontier orbitals HOMO and LUMO of the monomer (B3LYP/6-31G\*), which dominate the strongest  $\pi \rightarrow \pi^*$  transition according to TD-B3LYP/6-31G\*.

## TD-DFT calculations for the dimer

| distance $R$ [Å] | transition               | $\Delta E_{eg}$ [eV] | $\mu_{eg}$ [ea <sub>0</sub> ] | character                |
|------------------|--------------------------|----------------------|-------------------------------|--------------------------|
| 3.5              | $S_0 \rightarrow S_4$    | 2.860                | 1.36                          | $\pi \rightarrow \pi^*$  |
|                  | $S_0 \rightarrow S_8$    | 3.342                | 2.09                          | mix. $\rightarrow \pi^*$ |
|                  | $S_0 \rightarrow S_9$    | 3.451                | 1.73                          | mix. $\rightarrow \pi^*$ |
|                  | $S_0 \rightarrow S_{12}$ | 3.886                | 2.36                          | $\pi \rightarrow \pi^*$  |
| 4.0              | $S_0 \rightarrow S_6$    | 3.417                | 1.67                          | mix. $\rightarrow \pi^*$ |
|                  | $S_0 \rightarrow S_7$    | 3.492                | 2.12                          | mix $\rightarrow \pi^*$  |
|                  | $S_0 \rightarrow S_8$    | 3.554                | 2.43                          | mix. $\rightarrow \pi^*$ |
| 4.5              | $S_0 \rightarrow S_9$    | 3.671                | 1.70                          | $\pi \rightarrow \pi^*$  |
|                  | $S_0 \rightarrow S_8$    | 3.587                | 4.20                          | $\pi \rightarrow \pi^*$  |
|                  | $S_0 \rightarrow S_8$    | 3.581                | 4.38                          | $\pi \rightarrow \pi^*$  |
| 5.0              | $S_0 \rightarrow S_8$    | 3.569                | 4.45                          | $\pi \rightarrow \pi^*$  |
| 5.5              | $S_0 \rightarrow S_8$    | 3.557                | 4.50                          | $\pi \rightarrow \pi^*$  |
| 6.0              | $S_0 \rightarrow S_8$    | 3.546                | 4.53                          | $\pi \rightarrow \pi^*$  |
| 6.5              | $S_0 \rightarrow S_7$    | 3.537                | 4.56                          | $\pi \rightarrow \pi^*$  |
| 7.0              | $S_0 \rightarrow S_7$    | 3.530                | 4.58                          | $\pi \rightarrow \pi^*$  |
| 7.5              | $S_0 \rightarrow S_7$    | 3.523                | 4.61                          | $\pi \rightarrow \pi^*$  |
| 8.0              | $S_0 \rightarrow S_6$    | 3.517                | 4.62                          | $\pi \rightarrow \pi^*$  |
| 8.5              | $S_0 \rightarrow S_6$    | 3.513                | 4.64                          | $\pi \rightarrow \pi^*$  |
| 9.0              | $S_0 \rightarrow S_6$    | 3.508                | 4.65                          | $\pi \rightarrow \pi^*$  |
| 9.5              | $S_0 \rightarrow S_6$    | 3.505                | 4.66                          | $\pi \rightarrow \pi^*$  |
| 10.0             | $S_0 \rightarrow S_6$    | 3.477                | 3.37                          | $\pi \rightarrow \pi^*$  |
| monomer          | $S_0 \rightarrow S_2$    |                      |                               |                          |

Table 2: Excitation energies, transition dipole moments, and characters of the strongest transitions for different intermolecular distances in the dimer model, obtained with TD-B3LYP/6-31G\*. By “mix.” we indicate mixed  $n$ - and  $\pi$ -character.

## A simple, Hückel-type excitonic band model

If  $N = 2M + 1$  are placed along a chain with periodic boundary conditions, assuming that nearest neighbours (only) at distance  $R$  interact through a coupling matrix element  $\Delta^{(2)}$ , the single-exciton states form a band with energies given by Eq.(14), and corresponding single-exciton wavefunctions given by

$$\psi(k) = \frac{1}{\sqrt{N}} \sum_{n=-M}^{+M} e^{iknR} \Phi_n \quad , \quad (1)$$

where  $|\Phi_n\rangle = |gg \cdots geg \cdots gg\rangle$  has an excitation ( $e$ ) at the  $n$ -th position of the chain. In the ground state  $\psi_G$ , which is assumed to be a dispersionless product state, all monomers are unexcited. The transition dipole matrix

elements for transitions from the ground state into the single-exciton band are

$$\underline{\mu}_G(k) = \langle \psi_G | \hat{\underline{\mu}} | \psi(k) \rangle \quad (2)$$

$$= \langle gg \cdots g | \sum_{m=-M}^{+M} \hat{\underline{\mu}}^{(m)} | \frac{1}{\sqrt{N}} \sum_{n=-M}^{+M} e^{iknR} gg \cdots geg \cdots gg \rangle \quad (3)$$

$$= \frac{1}{\sqrt{N}} \sum_{n=-M}^{+M} e^{iknR} \underline{\mu}_{eg}^{(n)} \quad , \quad (4)$$

where  $\underline{\mu}_{eg}^{(n)}$  is the transition dipole of the  $n$ -th monomer. The strongest total transition dipole moment occurs for  $k = 0$  and is given by Eq.(15).
